# Supplementary material for: FTIR spectral signature of anticancer drug effects on PC-3 cancer cells: is there any influence of the cell cycle?
Source: Royal Society of Chemistry journal article supplement (doi:10.1039/c3an00225j), 2013-01-01
Supplement: c3an00225j.pdf [file c3an00225j.pdf]

Supplementary data:

FTIR spectral signature of anticancer drug effects on PC-3 cancer cells: is there any influence of the cell cycle?

Allison Derenne, Alix Mignolet and Erik Goormaghtigh

Center for Structural Biology and Bioinformatics, Laboratory for the Structure and Function of Biological Membranes, Campus Plaine CP206/02; Université Libre de Bruxelles, Bld du Triomphe 2, CP206/2, B1050 Brussels, Belgium

Detailed analysis of flow cytometry data.

Figure 6A:

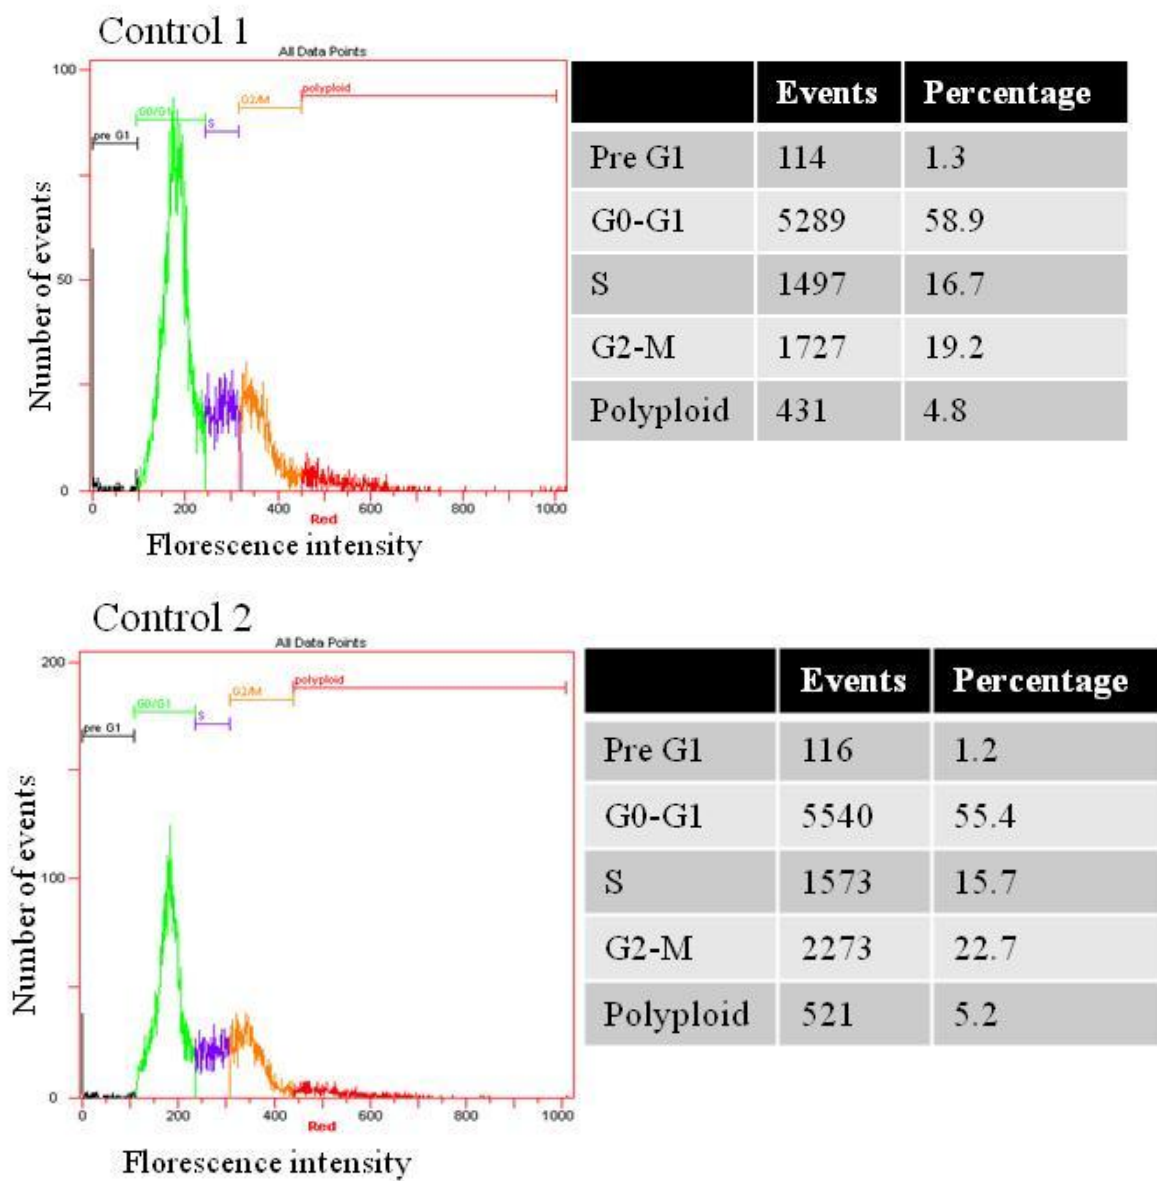

Figure 6B:

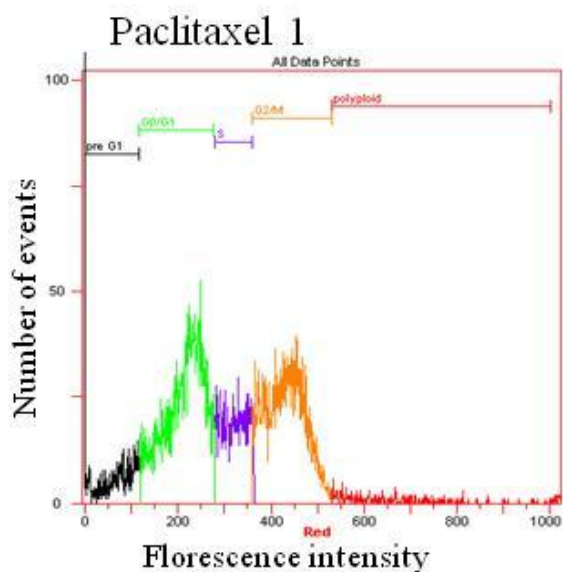

|           | Events | Percentage |
|-----------|--------|------------|
| Pre G1    | 821    | 8.2        |
| G0-G1     | 3844   | 38.4       |
| S         | 1613   | 16.1       |
| G2-M      | 3518   | 35.2       |
| Polyploid | 256    | 2.6        |

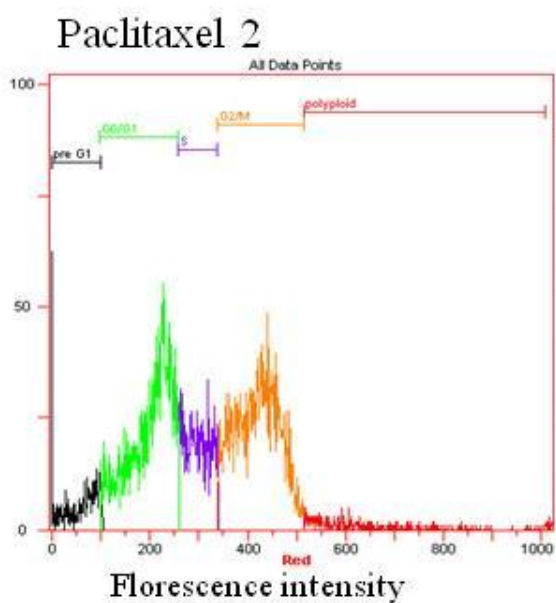

|           | Events | Percentage |
|-----------|--------|------------|
| Pre G1    | 603    | 6          |
| G0-G1     | 3563   | 35.6       |
| S         | 1603   | 16         |
| G2-M      | 3962   | 39.6       |
| Polyploid | 299    | 3          |

Figure 7:

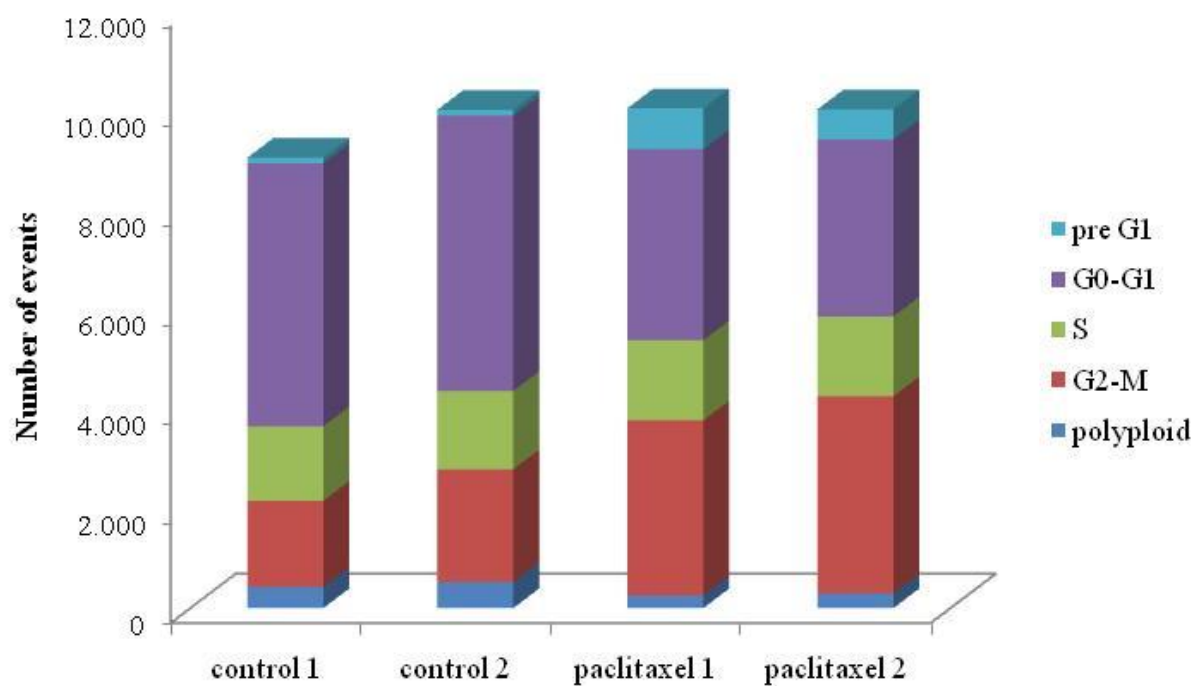

Legend of figures:

Figure 6: Flow cytometry analyses of untreated (6A) and untreated (6B) cells fixed and marked with propidium iodide as explained in section 6 of Materials and Methods. Fluorescence intensity is measured for each particles passing through the laser. As propidium iodide fluorescence is proportional to DNA quantity, the cell cycle stage of each cell could be defined. The associated tables show the number of events and the percentage assigned to each cell cycle phase. The number of total events is comprised between 8000 and 10000 for all the samples. Polyploids are cells containing more than two copies of DNA. A few percent are frequently present in cancer cell lines. So-called pre G1 corresponds generally to cell fragments. For a better and easier understanding, polyploids and pre G1 were not considered in Table 2.

Figure 7: Histogram representing the number of cell events in every stages of the cycle for each sample. The histogram was obtained based on flow cytometry results presented in Figure 6.
